# Supplementary material for: Differentiating IDH-mutant astrocytomas and 1p19q-codeleted oligodendrogliomas using DSC-PWI: high performance through cerebral blood volume and percentage of signal recovery percentiles
Source: Springer Nature journal article supplement (doi:10.1007/s00330-024-10611-z), 2024-01-29

# Differentiating IDH-mutant astrocytomas and 1p19q-codeleted oligodendrogliomas using DSC-PWI: high performance through cerebral blood volume and percentage of signal recovery percentiles

**Supplemental material 1.** Summary of technical details of the morphological sequences (T1WI, T2WI and FLAIR).

| Sequence (3T) | Type (GRE/SE) | FA (°) | TR (ms)~ | TE (ms)~ | Matrix  | Slice Thickness (mm) |
|---------------|---------------|--------|----------|----------|---------|----------------------|
| T1            | GRE           | 8      | 10       | 5        | 299x296 | 3                    |
| T2            | SE            | 90     | 3000     | 95       | 480x400 | 3                    |
| FLAIR         | SE            | 90     | 5500     | 300      | 220x217 | 3                    |

  

| Sequence (1.5T) | Type (GRE/SE) | FA (°) | TR (ms)~ | TE (ms)~ | Matrix  | Slice Thickness (mm) |
|-----------------|---------------|--------|----------|----------|---------|----------------------|
| T1              | SE            | 90     | 500      | 15       | 288x255 | 5                    |
| T2              | SE            | 90     | 5000     | 100      | 288x238 | 5                    |
| FLAIR           | SE            | 90     | 11000    | 140      | 288x160 | 5                    |

**Supplemental material 2.** Python script for the recursive feature elimination.

```
import pandas as pd

from sklearn.ensemble import GradientBoostingClassifier

from sklearn.feature_selection import RFE

# Sample data loading (replace this with your actual data loading)

# Ensure to adjust the file path and sheet name according to your needs

df = pd.read_excel("path_to_your_file.xlsx", sheet_name="your_sheet_name")

# Specify the target variable

y = df['Astro/Oligo']

Eur Radiol (2024) Pons-Escoda A, Garcia-Ruiz A, Navel-Baudin P et al
```

```

# Specify the features X

# These specific features were chosen based on AUC-ROC > 0.8, p < 0.005

X = df[["cbv_p70", "cbv_p75", "psr_p40", "psr_p45", "psr_p50", "psr_p55", "psr_p60", "psr_p65",
"psr_p70", "psr_p75"]]

# Set up the Gradient Boosting model

gb = GradientBoostingClassifier(n_estimators=200, random_state=42)

# Apply RFE to select a specific number of features

selector = RFE(estimator=gb, n_features_to_select=5, step=1)

X_selected = selector.fit_transform(X, y)

# Show the selected features

selected_features = X.columns[selector.support_].tolist()

print("Selected features:", selected_features)

```

**Supplemental material 3.** Python script for the final classifier construction.

```

import pandas as pd

from sklearn.ensemble import GradientBoostingClassifier

from sklearn.model_selection import StratifiedKFold, cross_val_score

from sklearn.pipeline import Pipeline

from sklearn.preprocessing import StandardScaler

# Load the dataset

file_path = 'path_to_your_file.xlsx'

df = pd.read_excel(file_path, sheet_name='Name')

Eur Radiol (2024) Pons-Escoda A, Garcia-Ruiz A, Navel-Baudin P et al

```

```
# Define the target variable
```

```
y = df['Astro/Oligo']
```

```
# Define the features
```

```
# These specific features were chosen based on AUC-ROC > 0.8, p < 0.005,
```

```
# and a Recursive Feature Elimination (RFE) procedure, resulting in a maximum of 5 features
```

```
selected_features = ['cbv_p70', 'psr_p65', 'psr_p60', 'cbv_p75', 'psr_p40']
```

```
X = df[selected_features]
```

```
# Define the classifier
```

```
# The hyperparameters (learning_rate, max_depth, n_estimators) were tuned using GridSearchCV
```

```
gb = GradientBoostingClassifier(learning_rate=0.01, max_depth=1, n_estimators=200,  
random_state=42)
```

```
# Define a pipeline for preprocessing and classification
```

```
pipeline = Pipeline([
```

```
    ('scl', StandardScaler()), # Standardize features
```

```
    ('clf', gb), # Classifier
```

```
])
```

```
# Define a stratified 10-fold cross-validation
```

```
cv = StratifiedKFold(n_splits=10, shuffle=True, random_state=42)
```

```
# Calculate cross-validated AUC-ROC and accuracy scores
```

```
roc_auc_scores = cross_val_score(pipeline, X, y, scoring='roc_auc', cv=cv, n_jobs=-1)
```

```
accuracy_scores = cross_val_score(pipeline, X, y, scoring='accuracy', cv=cv, n_jobs=-1)
```

Eur Radiol (2024) Pons-Escoda A, Garcia-Ruiz A, Navel-Baudin P et al

```

# Print mean and standard deviation of scores

print(f"AUC ROC: {roc_auc_scores.mean():.3f} (+/- {roc_auc_scores.std():.3f})")
print(f"Accuracy: {accuracy_scores.mean():.3f} (+/- {accuracy_scores.std():.3f})")

# Print individual cross-validation scores

print("Individual AUC ROC scores: ", roc_auc_scores)
print("Individual Accuracy scores: ", accuracy_scores)

# Now, train the model on the whole dataset and get the feature importances

pipeline.fit(X, y)

# Get feature importances from the trained model

importances = pipeline.named_steps['clf'].feature_importances_

# Create a dataframe for visualization

importances_df = pd.DataFrame({
    'Feature': selected_features,
    'Importance': importances
})

# Sort the dataframe by importance

importances_df = importances_df.sort_values(by='Importance', ascending=False)

print("Feature Importances:")
print(importances_df)

```

**Supplemental material 4.** All range of values (mean for each variable) in astrocytomas and oligodendrogliomas, accompanied by AUC-ROCs and their 95% confidence intervals, and U-Mann Whitney p-values with and without Bonferroni correction. An asterisk (\*) indicates AUC-ROC > 0.8, p < 0.005, and p-value after Bonferroni correction < 0.05.

|            |      | Astros       | Oligos | AUC_ROC | CI           | p-value | p-Bonferroni |
|------------|------|--------------|--------|---------|--------------|---------|--------------|
|            |      | <b>nrCBV</b> | Min    | 0.09    | 0.13         | 0.67    | [0.63, 0.72] |
|            | p10  | 0.24         | 0.34   | 0.71    | [0.65, 0.77] | 0.0223  | 1            |
|            | p15  | 0.36         | 0.51   | 0.74    | [0.7, 0.79]  | 0.011   | 0.7159       |
|            | p20  | 0.48         | 0.64   | 0.73    | [0.68, 0.78] | 0.0084  | 0.5485       |
|            | p25  | 0.58         | 0.77   | 0.71    | [0.66, 0.76] | 0.0051  | 0.333        |
|            | p30  | 0.67         | 0.89   | 0.73    | [0.68, 0.78] | 0.0024  | 0.1549       |
|            | p35  | 0.76         | 1.02   | 0.73    | [0.68, 0.78] | 0.0021  | 0.137        |
|            | p40  | 0.86         | 1.14   | 0.74    | [0.69, 0.79] | 0.0014  | 0.0942       |
|            | p45  | 0.95         | 1.28   | 0.77    | [0.72, 0.81] | 0.0011  | 0.0683       |
|            | p50  | 1.06         | 1.43   | 0.78    | [0.74, 0.83] | 0.0011  | 0.0729       |
|            | p55  | 1.17         | 1.59   | 0.78    | [0.74, 0.83] | 0.0011  | 0.0729       |
|            | p60  | 1.31         | 1.77   | 0.77    | [0.72, 0.81] | 0.0011  | 0.0683       |
|            | p65  | 1.45         | 1.98   | 0.77    | [0.72, 0.81] | 0.001   | 0.064        |
|            | p70  | 1.63         | 2.23   | 0.80*   | [0.76, 0.84] | 0.0007* | 0.0430*      |
|            | p75  | 1.86         | 2.53   | 0.80*   | [0.76, 0.84] | 0.0006* | 0.0376*      |
|            | p80  | 2.16         | 2.98   | 0.78    | [0.74, 0.83] | 0.0005  | 0.0351*      |
|            | p85  | 2.6          | 3.53   | 0.75    | [0.7, 0.8]   | 0.0011  | 0.0683       |
|            | p90  | 3.27         | 4.37   | 0.73    | [0.69, 0.78] | 0.0018  | 0.1138       |
|            | Max  | 4.72         | 5.91   | 0.69    | [0.65, 0.74] | 0.0116  | 0.7544       |
|            | Mean | 1.55         | 2.05   | 0.74    | [0.7, 0.78]  | 0.0014  | 0.0942       |
|            |      | Astros       | Oligos | AUC_ROC | CI           | p-value | p-Bonferroni |
| <b>PSR</b> | Min  | 0.27         | 0.19   | 0.67    | [0.59, 0.75] | 0.0136  | 0.8811       |
|            | p10  | 0.37         | 0.27   | 0.69    | [0.61, 0.76] | 0.0099  | 0.6441       |
|            | p15  | 0.44         | 0.33   | 0.71    | [0.63, 0.78] | 0.0051  | 0.333        |
|            | p20  | 0.49         | 0.38   | 0.73    | [0.66, 0.81] | 0.002   | 0.1288       |
|            | p25  | 0.53         | 0.42   | 0.78    | [0.72, 0.84] | 0.0009  | 0.06         |
|            | p30  | 0.57         | 0.46   | 0.77    | [0.71, 0.83] | 0.0008  | 0.0492*      |
|            | p35  | 0.6          | 0.49   | 0.79    | [0.74, 0.84] | 0.0005  | 0.0306*      |
|            | p40  | 0.64         | 0.52   | 0.81*   | [0.76, 0.85] | 0.0004* | 0.0286*      |
|            | p45  | 0.66         | 0.55   | 0.82*   | [0.78, 0.87] | 0.0003* | 0.0175*      |
|            | p50  | 0.69         | 0.58   | 0.82*   | [0.78, 0.87] | 0.0002* | 0.0151*      |
|            | p55  | 0.72         | 0.6    | 0.81*   | [0.77, 0.86] | 0.0003* | 0.0201*      |
|            | p60  | 0.75         | 0.63   | 0.82*   | [0.77, 0.86] | 0.0003* | 0.0201*      |
|            | p65  | 0.78         | 0.66   | 0.82*   | [0.78, 0.86] | 0.0004* | 0.0232*      |

|             |      |      |       |              |         |         |
|-------------|------|------|-------|--------------|---------|---------|
| <b>p70</b>  | 0.81 | 0.69 | 0.84* | [0.79, 0.88] | 0.0005* | 0.0306* |
| <b>p75</b>  | 0.85 | 0.73 | 0.83* | [0.78, 0.87] | 0.0006* | 0.0402* |
| <b>p80</b>  | 0.9  | 0.77 | 0.79  | [0.75, 0.84] | 0.0008  | 0.0525  |
| <b>p85</b>  | 0.96 | 0.83 | 0.78  | [0.74, 0.83] | 0.0016  | 0.1069  |
| <b>p90</b>  | 1.07 | 0.93 | 0.75  | [0.71, 0.79] | 0.0025  | 0.1646  |
| <b>Max</b>  | 1.35 | 1.17 | 0.64  | [0.58, 0.7]  | 0.0122  | 0.7946  |
| <b>Mean</b> | 0.81 | 0.68 | 0.73  | [0.68, 0.78] | 0.0051  | 0.333   |

**Supplemental material 5.** All range of values (mean for each variable) in astrocytomas and oligodendrogliomas categorized by grade 2 and grade 3, accompanied by U-Mann Whitney p-values.

| <b>Astros</b>  |                |                |                | <b>Oligos</b>  |                |                |                |
|----------------|----------------|----------------|----------------|----------------|----------------|----------------|----------------|
|                | <b>Grade 2</b> | <b>Grade 3</b> | <b>p-value</b> |                | <b>Grade 2</b> | <b>Grade 3</b> | <b>p-value</b> |
| <b>CBVmin</b>  | 0.09           | 0.10           | 0.42           | <b>CBVmin</b>  | 0.14           | 0.12           | 1.00           |
| <b>CBVp10</b>  | 0.23           | 0.24           | 0.58           | <b>CBVp10</b>  | 0.33           | 0.34           | 0.90           |
| <b>CBVp15</b>  | 0.35           | 0.37           | 0.42           | <b>CBVp15</b>  | 0.49           | 0.52           | 0.90           |
| <b>CBVp20</b>  | 0.46           | 0.48           | 0.42           | <b>CBVp20</b>  | 0.61           | 0.66           | 0.95           |
| <b>CBVp25</b>  | 0.58           | 0.57           | 0.42           | <b>CBVp25</b>  | 0.72           | 0.80           | 0.90           |
| <b>CBVp30</b>  | 0.69           | 0.66           | 0.51           | <b>CBVp30</b>  | 0.82           | 0.93           | 0.67           |
| <b>CBVp35</b>  | 0.79           | 0.75           | 0.54           | <b>CBVp35</b>  | 0.93           | 1.06           | 0.50           |
| <b>CBVp40</b>  | 0.90           | 0.84           | 0.68           | <b>CBVp40</b>  | 1.03           | 1.20           | 0.46           |
| <b>CBVp45</b>  | 1.02           | 0.92           | 0.76           | <b>CBVp45</b>  | 1.14           | 1.35           | 0.50           |
| <b>CBVp50</b>  | 1.14           | 1.02           | 0.92           | <b>CBVp50</b>  | 1.27           | 1.51           | 0.50           |
| <b>CBVp55</b>  | 1.28           | 1.13           | 0.92           | <b>CBVp55</b>  | 1.40           | 1.68           | 0.46           |
| <b>CBVp60</b>  | 1.44           | 1.25           | 0.92           | <b>CBVp60</b>  | 1.56           | 1.87           | 0.46           |
| <b>CBVp65</b>  | 1.62           | 1.38           | 0.96           | <b>CBVp65</b>  | 1.74           | 2.11           | 0.43           |
| <b>CBVp70</b>  | 1.85           | 1.54           | 0.88           | <b>CBVp70</b>  | 1.96           | 2.37           | 0.43           |
| <b>CBVp75</b>  | 2.14           | 1.74           | 0.68           | <b>CBVp75</b>  | 2.23           | 2.68           | 0.46           |
| <b>CBVp80</b>  | 2.52           | 2.01           | 0.45           | <b>CBVp80</b>  | 2.74           | 3.10           | 0.46           |
| <b>CBVp85</b>  | 3.07           | 2.41           | 0.26           | <b>CBVp85</b>  | 3.29           | 3.65           | 0.33           |
| <b>CBVp90</b>  | 3.87           | 3.03           | 0.24           | <b>CBVp90</b>  | 4.15           | 4.47           | 0.71           |
| <b>CBVmax</b>  | 5.51           | 4.40           | 0.24           | <b>CBVmax</b>  | 5.75           | 5.99           | 0.90           |
| <b>CBVmean</b> | 1.75           | 1.48           | 0.72           | <b>CBVmean</b> | 1.94           | 2.10           | 0.50           |
| <b>PSRmin</b>  | 0.24           | 0.28           | 0.48           | <b>PSRmin</b>  | 0.24           | 0.16           | 0.08           |
| <b>PSRp10</b>  | 0.34           | 0.38           | 0.54           | <b>PSRp10</b>  | 0.33           | 0.24           | 0.09           |

|                |      |      |      |                |      |      |      |
|----------------|------|------|------|----------------|------|------|------|
| <b>PSRp15</b>  | 0.41 | 0.45 | 0.54 | <b>PSRp15</b>  | 0.40 | 0.30 | 0.08 |
| <b>PSRp20</b>  | 0.46 | 0.50 | 0.48 | <b>PSRp20</b>  | 0.44 | 0.35 | 0.06 |
| <b>PSRp25</b>  | 0.50 | 0.55 | 0.48 | <b>PSRp25</b>  | 0.49 | 0.39 | 0.06 |
| <b>PSRp30</b>  | 0.54 | 0.58 | 0.51 | <b>PSRp30</b>  | 0.52 | 0.42 | 0.08 |
| <b>PSRp35</b>  | 0.57 | 0.62 | 0.65 | <b>PSRp35</b>  | 0.55 | 0.46 | 0.09 |
| <b>PSRp40</b>  | 0.61 | 0.65 | 0.61 | <b>PSRp40</b>  | 0.58 | 0.49 | 0.09 |
| <b>PSRp45</b>  | 0.64 | 0.68 | 0.54 | <b>PSRp45</b>  | 0.60 | 0.52 | 0.11 |
| <b>PSRp50</b>  | 0.67 | 0.70 | 0.58 | <b>PSRp50</b>  | 0.63 | 0.55 | 0.09 |
| <b>PSRp55</b>  | 0.70 | 0.73 | 0.72 | <b>PSRp55</b>  | 0.65 | 0.58 | 0.13 |
| <b>PSRp60</b>  | 0.73 | 0.76 | 0.76 | <b>PSRp60</b>  | 0.68 | 0.61 | 0.18 |
| <b>PSRp65</b>  | 0.76 | 0.79 | 0.76 | <b>PSRp65</b>  | 0.70 | 0.64 | 0.18 |
| <b>PSRp70</b>  | 0.79 | 0.82 | 0.76 | <b>PSRp70</b>  | 0.73 | 0.68 | 0.18 |
| <b>PSRp75</b>  | 0.83 | 0.86 | 0.76 | <b>PSRp75</b>  | 0.76 | 0.72 | 0.33 |
| <b>PSRp80</b>  | 0.88 | 0.91 | 0.61 | <b>PSRp80</b>  | 0.79 | 0.76 | 0.39 |
| <b>PSRp85</b>  | 0.94 | 0.97 | 0.80 | <b>PSRp85</b>  | 0.84 | 0.83 | 0.50 |
| <b>PSRp90</b>  | 1.03 | 1.09 | 0.61 | <b>PSRp90</b>  | 0.91 | 0.94 | 0.58 |
| <b>PSRmax</b>  | 1.27 | 1.38 | 0.54 | <b>PSRmax</b>  | 1.06 | 1.23 | 0.95 |
| <b>PSRmean</b> | 0.76 | 0.83 | 0.72 | <b>PSRmean</b> | 0.67 | 0.69 | 0.95 |

**Supplemental material 6.** All range of values (mean for each variable) in astrocytomas and oligodendrogliomas based on the MR scanner field-strength used, accompanied by U-Mann Whitney p-values.

| <b>Astros</b> |             |           |                | <b>Oligos</b> |             |           |                |
|---------------|-------------|-----------|----------------|---------------|-------------|-----------|----------------|
|               | <b>1.5T</b> | <b>3T</b> | <b>p-value</b> |               | <b>1.5T</b> | <b>3T</b> | <b>p-value</b> |
| <b>CBVmin</b> | 0.06        | 0.20      | 0.09           | <b>CBVmin</b> | 0.12        | 0.18      | 0.26           |
| <b>CBVp10</b> | 0.20        | 0.33      | 0.09           | <b>CBVp10</b> | 0.31        | 0.46      | 0.12           |
| <b>CBVp15</b> | 0.34        | 0.45      | 0.30           | <b>CBVp15</b> | 0.47        | 0.65      | 0.16           |
| <b>CBVp20</b> | 0.45        | 0.54      | 0.38           | <b>CBVp20</b> | 0.60        | 0.80      | 0.21           |
| <b>CBVp25</b> | 0.56        | 0.63      | 0.43           | <b>CBVp25</b> | 0.72        | 0.95      | 0.16           |
| <b>CBVp30</b> | 0.65        | 0.71      | 0.50           | <b>CBVp30</b> | 0.84        | 1.07      | 0.18           |
| <b>CBVp35</b> | 0.75        | 0.79      | 0.60           | <b>CBVp35</b> | 0.97        | 1.20      | 0.24           |
| <b>CBVp40</b> | 0.85        | 0.87      | 0.72           | <b>CBVp40</b> | 1.10        | 1.33      | 0.33           |
| <b>CBVp45</b> | 0.95        | 0.95      | 0.72           | <b>CBVp45</b> | 1.23        | 1.46      | 0.41           |
| <b>CBVp50</b> | 1.06        | 1.04      | 0.88           | <b>CBVp50</b> | 1.38        | 1.60      | 0.49           |

|                |      |      |      |                |      |      |      |
|----------------|------|------|------|----------------|------|------|------|
| <b>CBVp55</b>  | 1.19 | 1.14 | 1.00 | <b>CBVp55</b>  | 1.54 | 1.76 | 0.63 |
| <b>CBVp60</b>  | 1.32 | 1.25 | 1.00 | <b>CBVp60</b>  | 1.72 | 1.94 | 0.68 |
| <b>CBVp65</b>  | 1.48 | 1.37 | 1.00 | <b>CBVp65</b>  | 1.94 | 2.16 | 0.73 |
| <b>CBVp70</b>  | 1.67 | 1.51 | 0.88 | <b>CBVp70</b>  | 2.19 | 2.39 | 0.73 |
| <b>CBVp75</b>  | 1.91 | 1.69 | 0.80 | <b>CBVp75</b>  | 2.50 | 2.67 | 0.95 |
| <b>CBVp80</b>  | 2.24 | 1.91 | 0.60 | <b>CBVp80</b>  | 2.96 | 3.04 | 1.00 |
| <b>CBVp85</b>  | 2.72 | 2.23 | 0.35 | <b>CBVp85</b>  | 3.54 | 3.52 | 0.95 |
| <b>CBVp90</b>  | 3.45 | 2.73 | 0.14 | <b>CBVp90</b>  | 4.37 | 4.33 | 0.95 |
| <b>CBVmax</b>  | 5.01 | 3.84 | 0.11 | <b>CBVmax</b>  | 5.91 | 5.89 | 0.89 |
| <b>CBVmean</b> | 1.61 | 1.40 | 0.40 | <b>CBVmean</b> | 2.02 | 2.15 | 0.63 |
| <b>PSRmin</b>  | 0.27 | 0.27 | 0.96 | <b>PSRmin</b>  | 0.19 | 0.17 | 0.73 |
| <b>PSRp10</b>  | 0.37 | 0.35 | 0.64 | <b>PSRp10</b>  | 0.28 | 0.25 | 0.68 |
| <b>PSRp15</b>  | 0.45 | 0.41 | 0.57 | <b>PSRp15</b>  | 0.34 | 0.31 | 0.73 |
| <b>PSRp20</b>  | 0.50 | 0.45 | 0.43 | <b>PSRp20</b>  | 0.38 | 0.36 | 0.84 |
| <b>PSRp25</b>  | 0.55 | 0.49 | 0.32 | <b>PSRp25</b>  | 0.43 | 0.40 | 0.78 |
| <b>PSRp30</b>  | 0.59 | 0.52 | 0.35 | <b>PSRp30</b>  | 0.46 | 0.44 | 0.84 |
| <b>PSRp35</b>  | 0.62 | 0.55 | 0.30 | <b>PSRp35</b>  | 0.49 | 0.47 | 0.78 |
| <b>PSRp40</b>  | 0.66 | 0.57 | 0.27 | <b>PSRp40</b>  | 0.52 | 0.50 | 0.78 |
| <b>PSRp45</b>  | 0.69 | 0.60 | 0.32 | <b>PSRp45</b>  | 0.55 | 0.53 | 0.73 |
| <b>PSRp50</b>  | 0.72 | 0.62 | 0.27 | <b>PSRp50</b>  | 0.58 | 0.55 | 0.68 |
| <b>PSRp55</b>  | 0.75 | 0.65 | 0.21 | <b>PSRp55</b>  | 0.61 | 0.58 | 0.73 |
| <b>PSRp60</b>  | 0.78 | 0.68 | 0.16 | <b>PSRp60</b>  | 0.64 | 0.60 | 0.68 |
| <b>PSRp65</b>  | 0.81 | 0.70 | 0.13 | <b>PSRp65</b>  | 0.67 | 0.63 | 0.62 |
| <b>PSRp70</b>  | 0.84 | 0.73 | 0.18 | <b>PSRp70</b>  | 0.70 | 0.66 | 0.63 |
| <b>PSRp75</b>  | 0.88 | 0.76 | 0.16 | <b>PSRp75</b>  | 0.74 | 0.69 | 0.53 |
| <b>PSRp80</b>  | 0.93 | 0.80 | 0.18 | <b>PSRp80</b>  | 0.79 | 0.72 | 0.45 |
| <b>PSRp85</b>  | 1.00 | 0.85 | 0.16 | <b>PSRp85</b>  | 0.85 | 0.76 | 0.30 |
| <b>PSRp90</b>  | 1.12 | 0.92 | 0.08 | <b>PSRp90</b>  | 0.96 | 0.81 | 0.18 |
| <b>PSRmax</b>  | 1.43 | 1.09 | 0.08 | <b>PSRmax</b>  | 1.23 | 0.92 | 0.37 |
| <b>PSRmean</b> | 0.86 | 0.67 | 0.17 | <b>PSRmean</b> | 0.71 | 0.60 | 0.41 |

**Supplemental material 7.** Heatmap showing the Spearman correlation coefficients between CBV and PSR values. The mean correlation remained a mere -0.22 (range, -0.52 to -0.0046). Furthermore, in the most discriminative variables included in our analysis (CBV percentiles p70 and



p75; PSR from p40 to p75), the range of Spearman correlation and p-values was -0.25 to -0.21 and 0.08 to 0.13 respectively, indicating a minimal and non-significant statistical correlation.

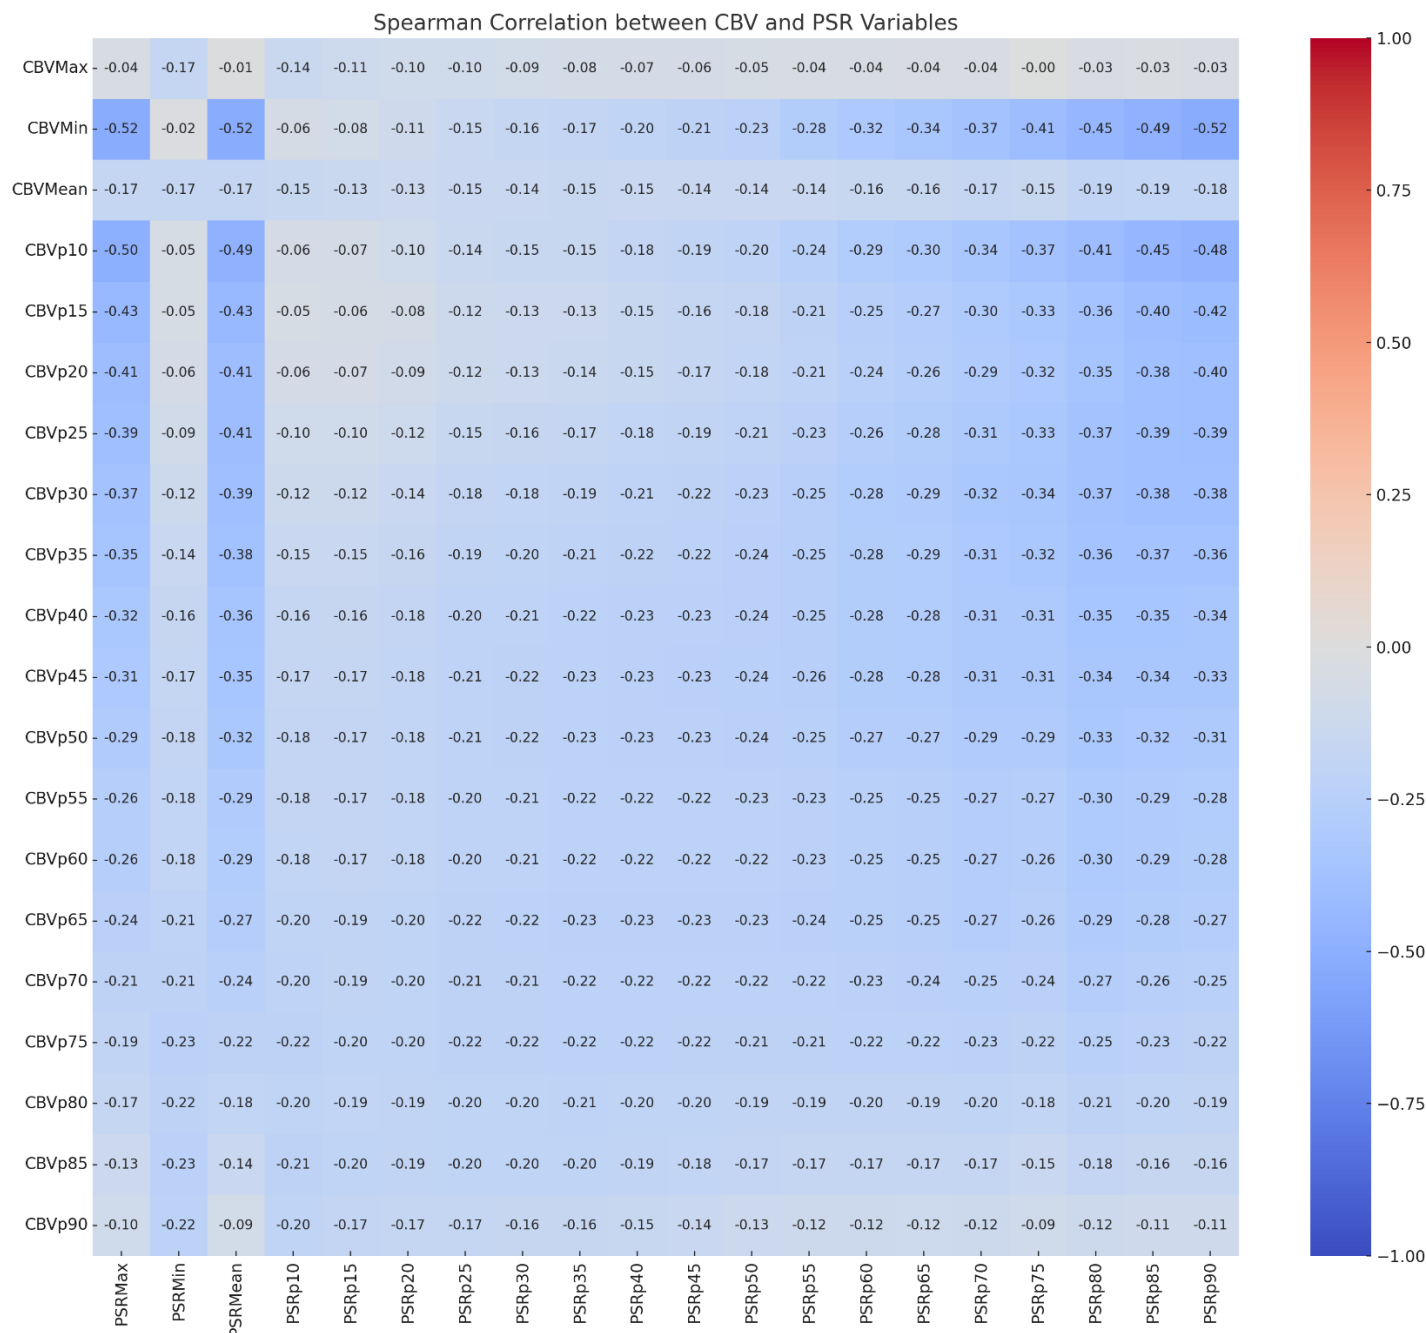

Supplement: MOESM1 [file 26671804]
